# Supplementary material for: Development and Characterisation of a Topical Methyl Salicylate Patch: Effect of Solvents on Adhesion and Skin Permeation
Source: MDPI journal article supplement (doi:10.3390/pharmaceutics14112491), 2022-11-17
Supplement: s1 [file s1]

### **Supplementary information:**

#### **Development and characterisation of a topical methyl salicylate patch: Effect of solvents on adhesion and skin permeation**

**Soo Chin Yeoh <sup>1</sup>, Poh Lee Loh <sup>2</sup>, Vikneswaran Murugaiyah <sup>3,4</sup> and Choon Fu Goh <sup>1,\*</sup>**

<sup>1</sup> Discipline of Pharmaceutical Technology, School of Pharmaceutical Sciences, Universiti Sains Malaysia, Minden 11800, Penang, Malaysia; soochin.yeoh@student.usm.my

<sup>2</sup> THP Medical Sdn Bhd, 1209, Jalan Perindustrian Bukit Minyak 18, Kawasan Perindustrian Bukit Minyak, Simpang Ampat 14100, Penang, Malaysia; rd@teonghuat.com.my

<sup>3</sup> Discipline of Pharmacology, School of Pharmaceutical Sciences, Universiti Sains Malaysia, Minden 11800, Penang, Malaysia; vicky@usm.my

<sup>4</sup> Centre for Drug Research, Universiti Sains Malaysia, Minden 11800, Penang, Malaysia

\* Correspondence: choonfugoh@usm.my

### **Correspondence:**

Choon Fu Goh, Discipline of Pharmaceutical Technology, School of Pharmaceutical Sciences, Universiti Sains Malaysia, 11800 Minden, Penang, Malaysia. email: choonfugoh@usm.my

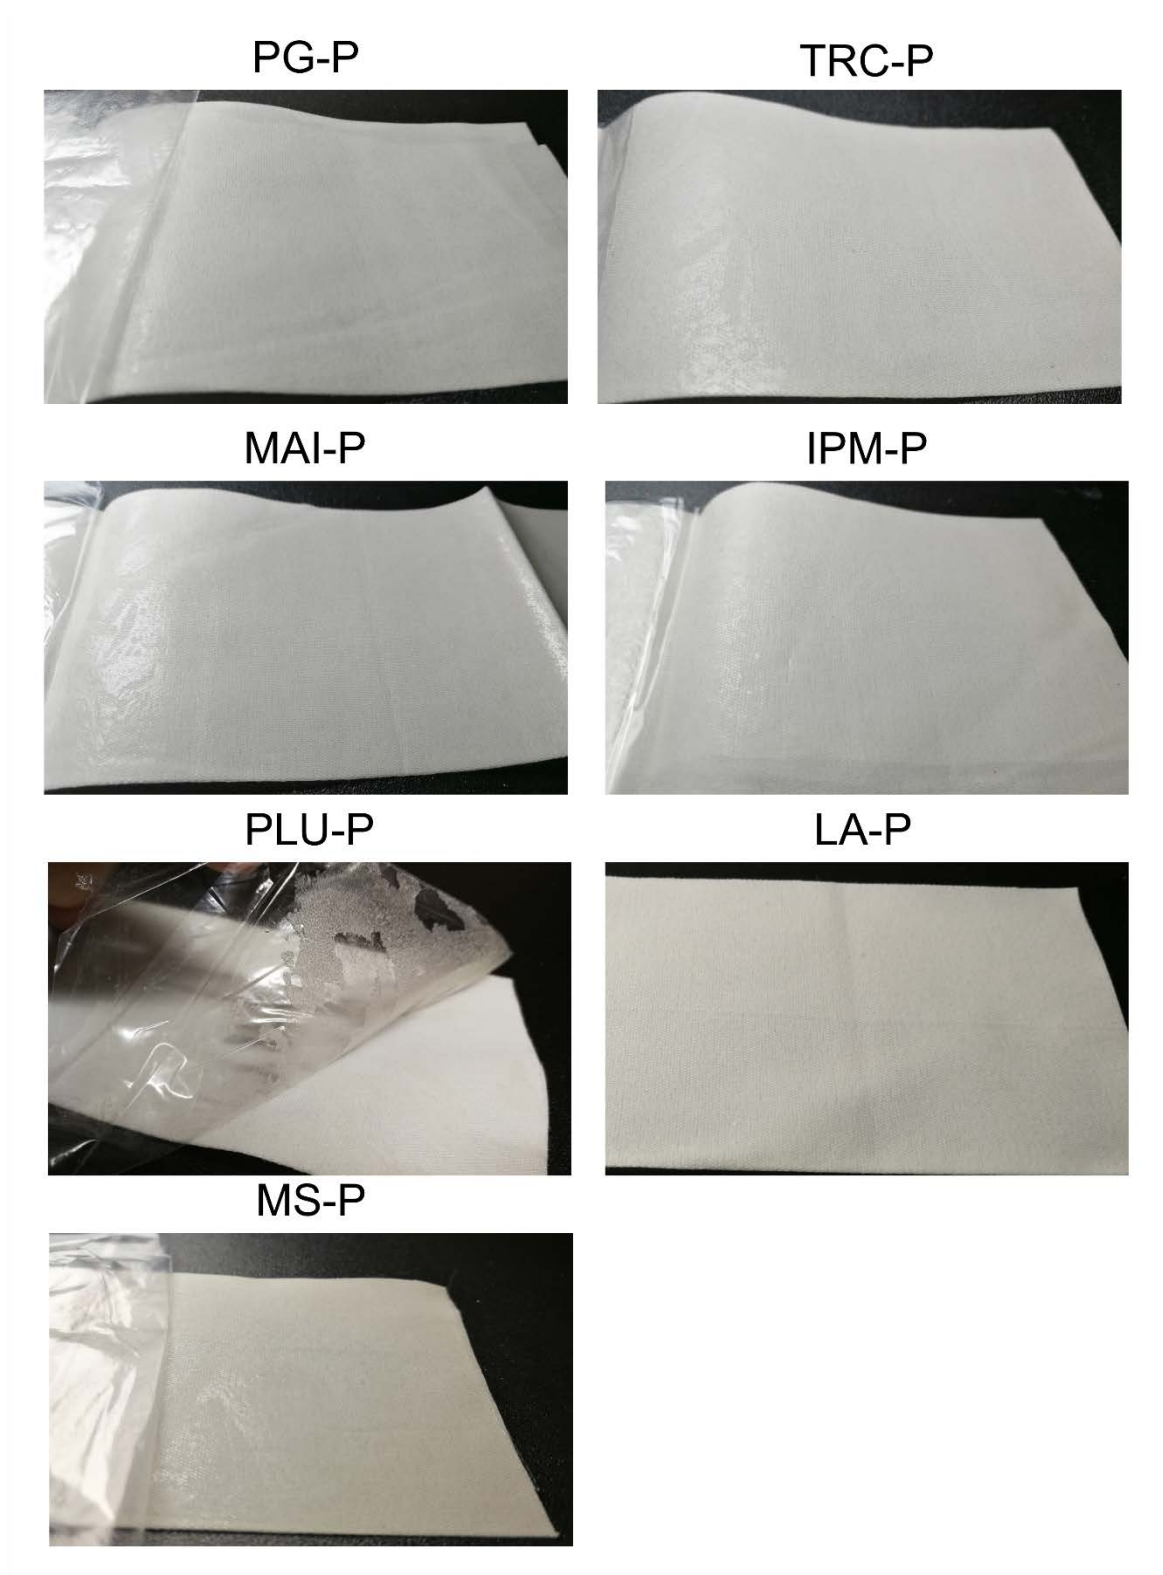

**Figure S1.** Images of selected MS-loaded patches with and without solvents. (PG: propylene glycol; TRC: Transcutol® P; MAI: Maisine® CC; IPM: isopropyl myristate; PLU: Plurol® oleique CC 497; LA: Labrasol®; MS: methyl salicylate; MS-P: patches with drug but without solvent; -P: patches with drug and solvent)

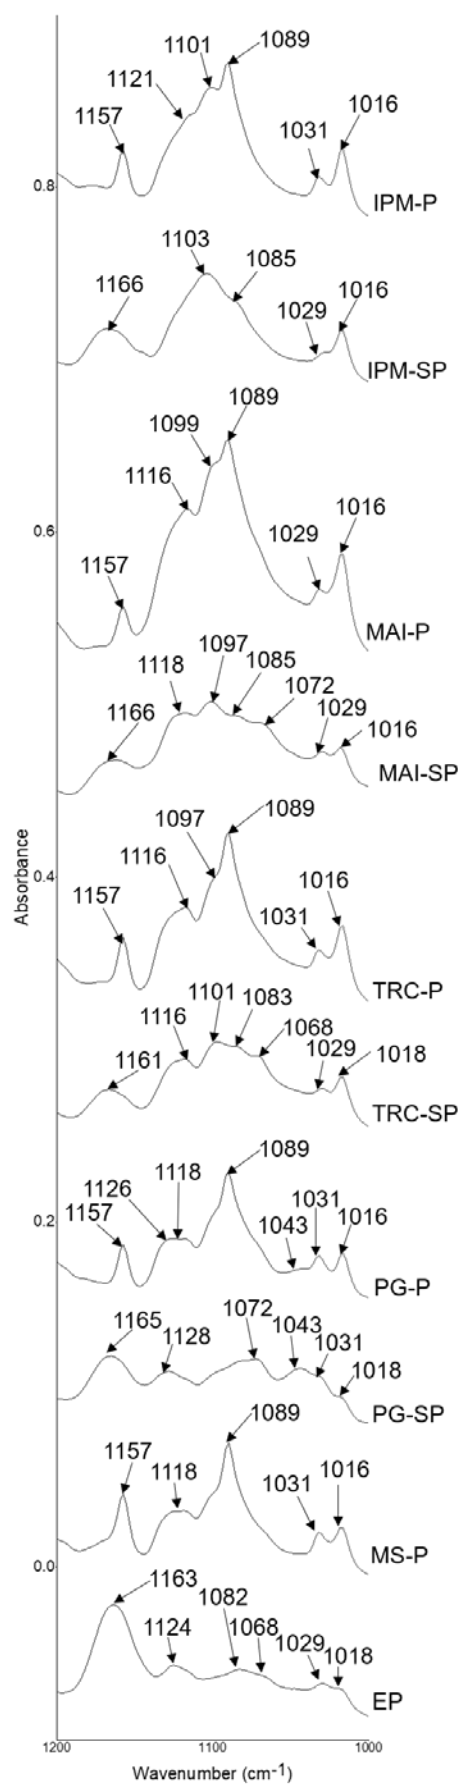

**Figure S2.** ATR-FTIR spectra of patches in the region of 1200 – 1000 cm<sup>-1</sup>

**Table S1. Miscibility study of 10%v/v of MS in different solvents over 24 h**

| Time (h) | Type of solvent                                                                     |                                                                                     |                                                                                     |                                                                                      |                                                                                       |                                                                                       |
|----------|-------------------------------------------------------------------------------------|-------------------------------------------------------------------------------------|-------------------------------------------------------------------------------------|--------------------------------------------------------------------------------------|---------------------------------------------------------------------------------------|---------------------------------------------------------------------------------------|
|          | PG                                                                                  | IPM                                                                                 | TRC                                                                                 | LA                                                                                   | MAI                                                                                   | PLU                                                                                   |
| 0        |    |    |    |    |    |    |
| 1        |    |    |    |    |    |    |
| 2        |    |    |    |    |    |    |
| 8        |   |   |   |   |   |   |
| 24       |  |  |  |  |  |  |
